# Supplementary material
Source: Springer Nature journal article supplement (https://www.springermedizin.de/resource/supplementary/12936_2012_2751_MOESM5_ESM.pdf/9544152)
Supplement: MOESM5 [file 9544152]

Additional File 5 : Parasite Prevalence Rates

| Authors           | Year  | Country                          | Artemisinin Derivatives | Partner Drug                         | Artemisinin Derivatives Dose (mg/kg/day) | Artemisinin Derivatives Dose (mg/day) | Doses Per Day | Days of Artemisinin | Supervised | Sample Size | D1 Parasitemic (%) | D2 Parasitemic (%) | D3 Parasitemic (%) | Comments                |
|-------------------|-------|----------------------------------|-------------------------|--------------------------------------|------------------------------------------|---------------------------------------|---------------|---------------------|------------|-------------|--------------------|--------------------|--------------------|-------------------------|
| 4ABC Study Group  | 2011  | Burkina Faso; Gabon; Nigeria; Rw | Artesunate              | Amodiaquine                          | 2.8-5.5                                  |                                       | 1             | 3                   | Yes        | 1002        |                    |                    |                    |                         |
| 4ABC Study Group  | 2011  | Burkina Faso; Gabon; Nigeria; Rw | Artesunate              | Chlorproguanil+Dapsone               | 3.4-5                                    |                                       | 1             | 3                   | Yes        | 413         |                    |                    |                    |                         |
| 4ABC Study Group  | 2011  | Burkina Faso; Gabon; Nigeria; Rw | Artemether              | Lumefantrine                         | 3.5-8                                    |                                       | 2             | 3                   | Yes        | 1226        |                    |                    |                    |                         |
| 4ABC Study Group  | 2011  | Burkina Faso; Gabon; Nigeria; Rw | Dihydroartemisinin      | Piperaquine                          | 2.25                                     |                                       | 1             | 3                   | Yes        | 1475        |                    |                    |                    |                         |
| Abacassamo et al. | 2004  | Mozambique                       | Artesunate              | Amodiaquine                          | 4                                        |                                       | 1             | 3                   | Yes        | 53          |                    |                    |                    |                         |
| Abacassamo et al. | 2004  | Mozambique                       | Artesunate              | Sulfadoxine+Pyrimethamine            | 4                                        |                                       | 1             | 3                   | Yes        | 53          |                    |                    |                    |                         |
| Abdulla et al.    | 2008  | Benin, Kenya, Mali, Mozambique   | Artemether              | Lumefantrine                         | 3.5-8                                    |                                       | 2             | 3                   | Yes        | 447         | 61.5               | 11.5               | 0.7                | Dispersible tablet      |
| Abdulla et al.    | 2008  | Benin, Kenya, Mali, Mozambique   | Artemether              | Lumefantrine                         | 3.5-8                                    |                                       | 2             | 3                   | Yes        | 452         | 62.6               | 10.6               | 0.7                | Crushed tablet          |
| Achan et al.      | 2009  | Uganda                           | Artemether              | Lumefantrine                         | 4-4.6                                    |                                       | 2             | 3                   | Partial    | 89          |                    |                    |                    |                         |
| Adam et al.       | 2005a | Sudan                            | Artesunate              | Mefloquine                           | 4                                        |                                       | 1             | 3                   | Yes        | 38          |                    |                    |                    |                         |
| Adam et al.       | 2005b | Sudan                            | Artesunate              | Sulfadoxine+Pyrimethamine            | 4                                        |                                       | 1             | 3                   | Yes        | 30          | 6.7                |                    | 0                  |                         |
| Adam et al.       | 2006  | Sudan                            | Artesunate              | Sulfamethoxy-pyrazine+Pyrimethamine  |                                          | 50-400                                | 1-2           | 2                   | Yes        | 39          | 2.6                |                    | 0                  | Fixed Dose              |
| Adam et al.       | 2006  | Sudan                            | Artesunate              | Sulfamethoxy-pyrazine+Pyrimethamine  |                                          | 50-200                                | 1             | 3                   | Yes        | 34          |                    |                    | 0                  | Loose                   |
| Adjei et al.      | 2008  | Ghana                            | Artesunate              | Amodiaquine                          | 4                                        |                                       | 1             | 3                   | Yes        | 116         | 50                 | 10                 | 0                  | PPR derived from figure |
| Adjei et al.      | 2008  | Ghana                            | Artemether              | Lumefantrine                         | 4.6-8                                    |                                       | 2             | 3                   | Partial    | 111         | 50                 | 8                  | 0                  | PPR derived from figure |
| Adjuik et al.     | 2002  | Kenya, Senegal, and Gabon        | Artesunate              | Amodiaquine                          | 4                                        |                                       | 1             | 3                   | Yes        | 160         | 80                 | 35                 | 10                 | PPR derived from figure |
| Adjuik et al.     | 2002  | Kenya, Senegal, and Gabon        | Artesunate              | Amodiaquine                          | 4                                        |                                       | 1             | 3                   | Yes        | 200         | 80                 | 16                 | 6                  | PPR derived from figure |
| Adjuik et al.     | 2002  | Kenya, Senegal, and Gabon        | Artesunate              | Amodiaquine                          | 4                                        |                                       | 1             | 3                   | Yes        | 110         | 50                 | 10                 | 5                  | PPR derived from figure |
| Agomo et al.      | 2008  | Nigeria                          | Artesunate              | Mefloquine                           | 4                                        |                                       | 1             | 3                   | Yes        | 208         | 59.1               | 7.9                | 0                  | Adult                   |
| Agomo et al.      | 2008  | Nigeria                          | Artesunate              | Mefloquine                           | 4                                        |                                       | 1             | 3                   | Yes        | 238         | 68.4               | 8.3                | 0                  | Child                   |
| Alecrim et al.    | 2006  | Brazil                           | Artemether              | Lumefantrine                         |                                          | 160                                   | 2             | 3                   | Yes        | 28          | 76                 | 17.9               | 0                  |                         |
| Allen et al.      | 2009  | Mozambique                       | Artesunate              | Sulfadoxine+Pyrimethamine            | 4                                        |                                       | 1             | 3                   | Yes        | 212         |                    |                    |                    |                         |
| Asante et al.     | 2009  | Ghana                            | Artesunate              | Amodiaquine                          | 3                                        |                                       | 2             | 3                   | Partial    | 190         |                    |                    |                    | Unsupervised            |
| Asante et al.     | 2009  | Ghana                            | Artesunate              | Amodiaquine                          | 3.1                                      |                                       | 2             | 3                   | Yes        | 211         |                    |                    |                    |                         |
| Ashley et al.     | 2007  | Thailand                         | Artemether              | Lumefantrine                         | Not specified                            |                                       | 2             | 3                   | Yes        | 17          |                    |                    | 0                  |                         |
| Ashley et al.     | 2007  | Thailand                         | Artemether              | Lumefantrine                         | Not specified                            |                                       | 1             | 3                   | Yes        | 19          |                    |                    | 0                  |                         |
| Ashley et al.     | 2004  | Thailand                         | Artesunate              | Mefloquine                           | 4                                        |                                       | 1             | 3                   | Yes        | 177         | 81.8               | 21.6               | 2.8                |                         |
| Ashley et al.     | 2004  | Thailand                         | Artesunate              | Mefloquine                           | 4                                        |                                       | 1             | 3                   | Yes        | 67          |                    |                    |                    |                         |
| Ashley et al.     | 2005  | Thailand                         | Artesunate              | Mefloquine                           | 4                                        |                                       | 1             | 3                   | Yes        | 166         | 84                 | 17                 | 2                  |                         |
| Ashley et al.     | 2006  | Thailand                         | Artesunate              | Mefloquine                           | 4                                        |                                       | 1             | 3                   | Yes        | 249         | 78                 | 29                 | 6                  | Loose                   |
| Ashley et al.     | 2006  | Thailand                         | Artesunate              | Mefloquine                           | 4.17                                     |                                       | 1             | 3                   | Yes        | 251         | 84                 | 39                 | 8                  | Fixed Dose              |
| Ashley et al.     | 2005  | Thailand                         | Dihydroartemisinin      | Piperaquine                          | 2.1                                      |                                       | 1             | 3                   | Yes        | 170         | 79                 | 19                 | 2                  |                         |
| Ashley et al.     | 2004  | Thailand                         | Dihydroartemisinin      | Piperaquine                          | 1.5-3.0                                  |                                       | 1-2           | 3                   | Yes        | 67          |                    |                    |                    |                         |
| Ashley et al.     | 2004  | Thailand                         | Dihydroartemisinin      | Piperaquine                          | 1.6-3.2                                  |                                       | 1-2           | 3                   | Yes        | 179         | 70.9               | 17.9               | 2.2                |                         |
| Ashley et al.     | 2005  | Thailand                         | Dihydroartemisinin      | Piperaquine                          | 1.6-3.2                                  |                                       | 1-2           | 3                   | Yes        | 163         | 74                 | 20                 | 2                  |                         |
| Ashley et al.     | 2004  | Thailand                         | Dihydroartemisinin      | Piperaquine+Artesunate               | 4                                        |                                       | 1-2           | 3                   | Yes        | 174         | 67.2               | 8.6                | 1.1                |                         |
| Ashley et al.     | 2004  | Thailand                         | Dihydroartemisinin      | Piperaquine+Artesunate               | 1.5-3.0                                  |                                       | 1-2           | 3                   | Yes        | 67          |                    |                    |                    |                         |
| Asih et al.       | 2009  | Indonesia                        | Artesunate              | Amodiaquine                          | 4                                        |                                       | 1             | 3                   | Yes        | 103         |                    |                    | 12.6               |                         |
| Assefa et al.     | 2010  | Ethiopia                         | Artemether              | Lumefantrine                         | Not specified                            |                                       | 2             | 3                   | Yes        | 90          |                    |                    | 1.1                |                         |
| Avila et al.      | 2004  | Bolivia                          | Artesunate              | Mefloquine                           | 4                                        |                                       | 1             | 3                   | Yes        | 70          |                    | 21.4               | 8.5                |                         |
| Ayede et al.      | 2010  | Nigeria                          | Artesunate              | Amodiaquine                          |                                          | 50-100                                | 1             | 3                   | Yes        | 250         | 29.4               | 3.8                | 0                  | Fixed Dose              |
| Ayede et al.      | 2010  | Nigeria                          | Artesunate              | Sulphamethoxy-pyrazine+Pyrimethamine |                                          | 50-200                                | 1-2           | 2                   | Yes        | 250         | 28.8               | 5.3                | 1.3                | Fixed Dose              |
| Barennes et al.   | 2004  | Burkina Faso                     | Artesunate              | Amodiaquine                          | 4                                        |                                       | 1             | 3                   | Yes        | 33          | 15.2               | 0                  | 0                  |                         |
| Barennes et al.   | 2004  | Burkina Faso                     | Artesunate              | Amodiaquine                          | 2-4                                      |                                       | 1             | 3                   | Yes        | 27          | 11                 | 0                  | 0                  |                         |
| Bassat et al.     | 2009  | Burkina Faso, Kenya, Mozambique  | Artemether              | Lumefantrine                         | 4.6-8                                    |                                       | 2             | 3                   | Yes        | 510         |                    |                    |                    |                         |
| Bassat et al.     | 2009  | Burkina Faso, Kenya, Mozambique  | Dihydroartemisinin      | Piperaquine                          | 2.25                                     |                                       | 1             | 3                   | Yes        | 1038        |                    |                    |                    |                         |
| Bell et al.       | 2009  | Malawi                           | Artemether              | Lumefantrine                         | 4-4.6                                    |                                       | 2             | 3                   | Partial    | 209         |                    |                    |                    |                         |
| Bell et al.       | 2008  | Malawi                           | Artesunate              | Sulfadoxine+Pyrimethamine            | 4                                        |                                       | 1             | 3                   | Yes        | 114         |                    | 5                  |                    |                         |
| Bethell et al.    | 2011  | Cambodia                         | Artesunate              |                                      | 2                                        |                                       | 1             | 7                   | Yes        | 75          |                    |                    | 49                 |                         |
| Bethell et al.    | 2011  | Cambodia                         | Artesunate              |                                      | 4                                        |                                       | 1             | 7                   | Yes        | 40          |                    |                    | 46                 |                         |
| Bethell et al.    | 2011  | Cambodia                         | Artesunate              |                                      | 6                                        |                                       | 1             | 7                   | Yes        | 28          |                    |                    | 48                 |                         |
| Blair et al.      | 2006  | Colombia                         | Artesunate              | Sulfadoxine+Pyrimethamine            | 4                                        |                                       | 1             | 3                   | Yes        | 57          |                    |                    |                    |                         |
| Bonnet et al.     | 2007  | Guinea                           | Artesunate              | Amodiaquine                          | 4                                        |                                       | 1             | 3                   | Yes        | 110         |                    |                    | 4.6                |                         |
| Bonnet et al.     | 2009  | The Democratic Republic of Cong  | Artesunate              | Amodiaquine                          | 4                                        |                                       | 1             | 3                   | Yes        | 58          |                    | 15.5               |                    |                         |
| Bonnet et al.     | 2009  | The Democratic Republic of Cong  | Artesunate              | Amodiaquine                          | 4                                        |                                       | 1             | 3                   | Yes        | 90          |                    | 64.4               |                    |                         |
| Bonnet et al.     | 2007  | Guinea                           | Artesunate              | Sulfadoxine+Pyrimethamine            | 4                                        |                                       | 1             | 3                   | Yes        | 110         |                    |                    | 3.7                |                         |
| Bonnet et al.     | 2009  | The Democratic Republic of Cong  | Artesunate              | Sulfadoxine+Pyrimethamine            | 4                                        |                                       | 1             | 3                   | Yes        | 62          |                    | 12.9               |                    |                         |
| Bonnet et al.     | 2009  | The Democratic Republic of Cong  | Artesunate              | Sulfadoxine+Pyrimethamine            | 4                                        |                                       | 1             | 3                   | Yes        | 91          |                    | 65.9               |                    |                         |
| Borrmann et al.   | 2005  | Gabon                            | Artesunate              | Fosmidomycin                         | 4                                        |                                       | 2             | 3                   | Yes        | 10          |                    |                    |                    |                         |

Additional File 5 : Parasite Prevalence Rates

| Authors              | Year  | Country                  | Artemisinin Derivatives | Partner Drug              | Artemisinin Derivatives Dose (mg/kg/day) | Artemisinin Derivatives Dose (mg/day) | Doses Per Day | Days of Artemisinin | Supervised | Sample Size | D1 Parasitemic (%) | D2 Parasitemic (%) | D3 Parasitemic (%) | Comments                |
|----------------------|-------|--------------------------|-------------------------|---------------------------|------------------------------------------|---------------------------------------|---------------|---------------------|------------|-------------|--------------------|--------------------|--------------------|-------------------------|
| Borrmann et al.      | 2005  | Gabon                    | Artesunate              | Fosmidomycin              | 4                                        |                                       | 2             | 1                   | Yes        | 10          |                    |                    |                    |                         |
| Borrmann et al.      | 2005  | Gabon                    | Artesunate              | Fosmidomycin              | 4                                        |                                       | 2             | 2                   | Yes        | 10          |                    |                    |                    |                         |
| Borrmann et al.      | 2005  | Gabon                    | Artesunate              | Fosmidomycin              | 2-4                                      |                                       | 2             | 4                   | Yes        | 10          |                    |                    |                    |                         |
| Borrmann et al.      | 2005  | Gabon                    | Artesunate              | Fosmidomycin              | 2-4                                      |                                       | 2             | 5                   | Yes        | 10          |                    |                    |                    |                         |
| Borrmann et al.      | 2011  | Kenya                    | Artemether              | Lumefantrine              | 4                                        |                                       | 2             | 3                   | Yes        | 241         | 90.3               | 11                 | 0                  |                         |
| Borrmann et al.      | 2011  | Kenya                    | Dihydroartemisinin      | Piperaquine               | 2.25                                     |                                       | 1             | 3                   | Yes        | 233         | 66.8               | 4.4                | 0                  |                         |
| Bousema et al.       | 2006  | Kenya                    | Artemether              | Lumefantrine              | Not specified                            |                                       | 2             | 3                   | Yes        | 75          |                    |                    |                    |                         |
| Bousema et al.       | 2006  | Kenya                    | Artesunate              | Sulfadoxine+Pyrimethamine | 4                                        |                                       | 1             | 3                   | Yes        | 174         |                    |                    |                    |                         |
| Bouyou-Akotet et al. | 2010  | Gabon                    | Artesunate              | Mefloquine                | 4                                        |                                       | 1             | 3                   | Yes        | 30          |                    |                    |                    |                         |
| Bouyou-Akotet et al. | 2010  | Gabon                    | Artesunate              | Mefloquine                | 4                                        |                                       | 1             | 3                   | Yes        | 41          |                    |                    |                    | pediatric group         |
| Bukirwa et al.       | 2006  | Uganda                   | Artesunate              | Amodiaquine               | 4                                        |                                       | 1             | 3                   | Yes        | 201         |                    | 2.5                | 0.5                |                         |
| Bukirwa et al.       | 2006  | Uganda                   | Artemether              | Lumefantrine              | 4-4.6                                    |                                       | 2             | 3                   | Yes        | 202         |                    | 2                  | 0.5                |                         |
| Campbell et al.      | 2006  | India                    | Artesunate              | Mefloquine                | 4                                        |                                       | 1             | 3                   | Yes        | 58          |                    | 11                 |                    |                         |
| Campbell et al.      | 2006  | India                    | Artesunate              | Mefloquine                | 4                                        |                                       | 1             | 3                   | Yes        | 58          |                    | 12                 |                    |                         |
| Chanda et al.        | 2006  | Zambia                   | Artemether              | Lumefantrine              | Not specified                            |                                       | 1             | 3                   | Yes        | 111         |                    |                    |                    |                         |
| Charle et al.        | 2009  | Equatorial Guinea        | Artesunate              | Sulfadoxine+Pyrimethamine | 4                                        |                                       | 1             | 3                   | Yes        | 86          | 77.2               | 3.8                | 0                  |                         |
| de Oliveira et al.   | 2011  | Peru                     | Artesunate              | Mefloquine                | 4                                        |                                       | 1             | 3                   | Partial    | 96          |                    |                    | 0                  | Unsupervised            |
| de Oliveira et al.   | 2011  | Peru                     | Artesunate              | Mefloquine                | 4                                        |                                       | 1             | 3                   | Yes        | 96          |                    |                    | 0                  |                         |
| de Vries et al.      | 2000  | Vietnam                  | Artemisinin             | Quinine                   | 20                                       |                                       | 1             | 1                   | Yes        | 88          |                    |                    |                    |                         |
| de Vries et al.      | 2000  | Vietnam                  | Artemisinin             | Quinine                   | 20                                       |                                       | 1             | 1                   | Yes        | 96          |                    |                    |                    |                         |
| Denis et al.         | 2006b | Cambodia                 | Artemether              | Lumefantrine              | 4.6-5                                    |                                       | 2             | 3                   | Yes        | 80          |                    |                    |                    |                         |
| Denis et al.         | 2006b | Cambodia                 | Artemether              | Lumefantrine              | 4.6-5                                    |                                       | 2             | 3                   | Yes        | 55          |                    |                    |                    |                         |
| Denis et al.         | 2006a | Cambodia                 | Artesunate              | Mefloquine                | 4                                        |                                       | 1             | 3                   | Yes        | 255         |                    |                    |                    |                         |
| Denis et al.         | 2006a | Cambodia                 | Artesunate              | Mefloquine                | 4                                        |                                       | 1             | 3                   | Yes        | 1025        |                    |                    |                    |                         |
| Denis et al.         | 2006b | Cambodia                 | Artesunate              | Mefloquine                | 4                                        |                                       | 1             | 3                   | Yes        | 55          |                    |                    |                    |                         |
| Denis et al.         | 2002  | Cambodia                 | Dihydroartemisinin      | Piperaquine               | 3.3-4.6                                  |                                       | 2             | 2                   | Yes        | 106         |                    |                    | 0                  |                         |
| Depoortere et al.    | 2005  | Zambia                   | Artesunate              | Sulfadoxine+Pyrimethamine | 4                                        |                                       | 1             | 3                   | No         | 84          |                    |                    |                    | Unsupervised            |
| Depoortere et al.    | 2005  | Zambia                   | Artesunate              | Sulfadoxine+Pyrimethamine | 4                                        |                                       | 1             | 3                   | Yes        | 85          |                    |                    |                    | Supervised              |
| Diem Thuy et al.     | 2007  | Vietnam                  | Dihydroartemisinin      | Mefloquine                |                                          | 300                                   | 1             | 2                   | Yes        | 44          |                    |                    |                    |                         |
| Diem Thuy et al.     | 2007  | Vietnam                  | Dihydroartemisinin      |                           |                                          | 100-300                               | 1             | 5                   | Yes        | 45          |                    |                    |                    |                         |
| Djimdé et al.        | 2008  | Mali                     | Artesunate              | Amodiaquine               | 4                                        |                                       | 1             | 3                   | Yes        | 252         |                    |                    | 0                  | PPR derived from figure |
| Djimdé et al.        | 2008  | Mali                     | Artesunate              | Sulfadoxine+Pyrimethamine | 4                                        |                                       | 1             | 3                   | Yes        | 250         |                    |                    | 0                  | PPR derived from figure |
| Djimdé et al.        | 2008  | Mali                     | Artesunate              |                           | 2-4                                      |                                       | 1             | 5                   | Yes        | 251         |                    |                    | 0                  | PPR derived from figure |
| Dondorp et al.       | 2009  | Cambodia and Thailand    | Artesunate              | Mefloquine                | 4                                        |                                       | 1             | 3                   | Yes        | 20          |                    | 73                 | 55                 |                         |
| Dondorp et al.       | 2009  | Cambodia and Thailand    | Artesunate              | Mefloquine                | 4                                        |                                       | 1             | 3                   | Yes        | 20          |                    | 45                 | 8                  |                         |
| Dondorp et al.       | 2009  | Cambodia and Thailand    | Artesunate              |                           | 2                                        |                                       | 1             | 7                   | Yes        | 20          |                    | 73                 | 55                 |                         |
| Dondorp et al.       | 2009  | Cambodia and Thailand    | Artesunate              |                           | 2                                        |                                       | 1             | 7                   | Yes        | 20          |                    | 45                 | 8                  |                         |
| Dunyo et al.         | 2011  | The Gambia               | Artemether              | Lumefantrine              | 4-4.6                                    |                                       | 2             | 3                   | Partial    | 618         |                    |                    |                    |                         |
| Durrani et al.       | 2005  | Afghanistan              | Artesunate              | Amodiaquine               | 4                                        |                                       | 1             | 3                   | Yes        | 79          | 37.5               | 4                  | 4                  | PPR derived from figure |
| Elamin et al.        | 2010  | Sudan                    | Artemether              | Lumefantrine              | Not specified                            |                                       | 2             | 3                   | Yes        | 291         | 24.4               |                    | 8.7                |                         |
| Falade et al.        | 2008a | Nigeria                  | Artesunate              | Amodiaquine               | 4                                        |                                       | 1             | 3                   | Yes        | 66          |                    |                    |                    |                         |
| Falade et al.        | 2005  | Kenya, Nigeria, Tanzania | Artemether              | Lumefantrine              | 3.2-8                                    |                                       | 2             | 3                   | Yes        | 310         | 44.3               | 1.6                |                    |                         |
| Falade et al.        | 2008b | Nigeria                  | Artemether              | Lumefantrine              | 3.2-8                                    |                                       | 2             | 3                   | Yes        | 103         | 24.7               |                    | 0                  |                         |
| Falade et al.        | 2008a | Nigeria                  | Artemether              | Lumefantrine              | 3.5-8                                    |                                       | 2             | 3                   | Yes        | 66          |                    |                    |                    |                         |
| Fanello et al.       | 2008  | Rwanda                   | Artesunate              | Chloroguanil+Dapsone      | 4                                        |                                       | 1             | 3                   | Yes        | 400         |                    | 1.3                | 0                  |                         |
| Fanello et al.       | 2007  | Rwanda                   | Artemether              | Lumefantrine              | 3.3-8                                    |                                       | 2             | 3                   | Yes        | 251         |                    | 2.8                | 0                  |                         |
| Faucher et al.       | 2009  | Benin                    | Artesunate              | Amodiaquine               | 5-5.6                                    |                                       | 1             | 3                   | Yes        | 96          |                    |                    |                    |                         |
| Faucher et al.       | 2009  | Benin                    | Artemether              | Lumefantrine              | 4-8                                      |                                       | 2             | 3                   | Yes        | 96          |                    |                    |                    |                         |
| Faye et al.          | 2007  | Senegal                  | Artesunate              | Amodiaquine               | 4                                        |                                       | 1             | 3                   | Yes        | 360         |                    |                    |                    |                         |
| Faye et al.          | 2010b | Senegal and Ivory Coast  | Artesunate              | Amodiaquine               | 2.32-4.65                                |                                       | 1             | 3                   | Yes        | 159         |                    | 0                  | 0                  |                         |
| Faye et al.          | 2010a | Senegal                  | Artemether              | Lumefantrine              | 4                                        |                                       | 2             | 3                   | Yes        | 160         |                    | 1.9                |                    |                         |
| Faye et al.          | 2007  | Senegal                  | Artemether              | Lumefantrine              | Not specified                            |                                       | 1-2           | 2                   | Yes        | 140         |                    |                    |                    |                         |
| Faye et al.          | 2007  | Senegal                  | Artemether              | Lumefantrine              | Not specified                            |                                       | 2             | 3                   | Yes        | 149         |                    |                    |                    |                         |
| Faye et al.          | 2010b | Senegal and Ivory Coast  | Artemether              | Lumefantrine              | Not specified                            |                                       | 2             | 3                   | Yes        | 163         |                    | 0                  | 0                  |                         |
| Faye et al.          | 2010a | Senegal                  | Artesunate              | Mefloquine                | 2.5-5                                    |                                       | 1             | 3                   | Yes        | 160         |                    | 2.5                |                    |                         |
| Faye et al.          | 2007  | Senegal                  | Artesunate              | Mefloquine                |                                          | 100-200                               | 1             | 3                   | Yes        | 145         |                    |                    |                    |                         |
| Fehintola et al.     | 2008  | Nigeria                  | Artesunate              | Amodiaquine               | 4                                        |                                       | 1             | 3                   | Yes        | 61          | 70                 | 14.7               |                    |                         |
| Fehintola et al.     | 2010  | Nigeria                  | Artesunate              | Chloroquine               | 4                                        |                                       | 2             | 3                   | Yes        | 26          | 50                 | 7.7                | 0                  |                         |
| Fehintola et al.     | 2008  | Nigeria                  | Artesunate              | Cotrimoxazole             | 4                                        |                                       | 1             | 3                   | Yes        | 121         | 30                 | 0.8                |                    |                         |

Additional File 5 : Parasite Prevalence Rates

| Authors            | Year  | Country               | Artemisinin Derivatives | Partner Drug                        | Artemisinin Derivatives Dose (mg/kg/day) | Artemisinin Derivatives Dose (mg/day) | Doses Per Day | Days of Artemisinin | Supervised | Sample Size | D1 Parasitemic (%) | D2 Parasitemic (%) | D3 Parasitemic (%) | Comments                            |
|--------------------|-------|-----------------------|-------------------------|-------------------------------------|------------------------------------------|---------------------------------------|---------------|---------------------|------------|-------------|--------------------|--------------------|--------------------|-------------------------------------|
| Fehintola et al.   | 2010  | Nigeria               | Artesunate              | Cotrimoxazole                       | 4                                        |                                       | 2             | 3                   | Yes        | 31          | 35.5               | 0                  | 0                  |                                     |
| Gbotosho et al.    | 2011b | Nigeria               | Artesunate              | Amodiaquine                         | 4                                        |                                       | 1             | 3                   | Yes        | 104         | 22.1               |                    |                    |                                     |
| Gbotosho et al.    | 2011a | Nigeria               | Artesunate              | Amodiaquine                         | 5.5                                      |                                       | 1             | 3                   | Yes        | 100         | 6                  |                    |                    | Coformulated Copackaged             |
| Gbotosho et al.    | 2011a | Nigeria               | Artesunate              | Amodiaquine                         | 4.4-10                                   |                                       | 1             | 3                   | Yes        | 104         | 5.8                |                    |                    |                                     |
| Gbotosho et al.    | 2011b | Nigeria               | Artesunate              | Amodiaquine                         | 4.4-10                                   |                                       | 1             | 3                   | Yes        | 27          | 3.7                |                    |                    |                                     |
| Gbotosho et al.    | 2011b | Nigeria               | Artesunate              | Amodiaquine                         | 4.4-10                                   |                                       | 1             | 3                   | Yes        | 104         | 6.7                |                    |                    |                                     |
| Gbotosho et al.    | 2011b | Nigeria               | Artemether              | Lumefantrine                        | 5.6                                      |                                       | 2             | 3                   | Yes        | 33          | 3                  |                    |                    |                                     |
| Gbotosho et al.    | 2011a | Nigeria               | Artemether              | Lumefantrine                        | 4.6-8                                    |                                       | 2             | 3                   | Yes        | 81          | 4.9                |                    |                    |                                     |
| Gbotosho et al.    | 2011b | Nigeria               | Artemether              | Lumefantrine                        | 4.6-8                                    |                                       | 2             | 3                   | Yes        | 36          | 11.1               |                    |                    |                                     |
| Giao et al.        | 2004  | Vietnam               | Dihydroartemisinin      | Piperaquine+Trimethoprim+Primaquine |                                          | 64-128                                | 1-2           | 3                   | Yes        | 82          |                    |                    |                    |                                     |
| Giao et al.        | 2001  | Vietnam               | Artemisinin             |                                     | 10.2                                     |                                       | 1-2           | 5                   | Yes        | 115         |                    |                    |                    |                                     |
| Giao et al.        | 2001  | Vietnam               | Artemisinin             |                                     | 10.3                                     |                                       | 1-2           | 7                   | Yes        | 112         |                    |                    |                    |                                     |
| Gil et al.         | 2003  | Sao Tome and Principe | Artesunate              | Chloroquine                         | 4                                        |                                       | 1             | 3                   | Yes        | 200         | 74.4               | 14.9               | 3.1                |                                     |
| Gomez et al.       | 2003  | Ecuador               | Artesunate              | Mefloquine                          | 6.6-13.8                                 |                                       | 1-3           | 3                   | Yes        | 50          |                    |                    |                    | Rectal                              |
| Gomez et al.       | 2003  | Ecuador               | Artesunate              | Mefloquine                          | 6.6-13.8                                 |                                       | 1-3           | 3                   | Yes        | 50          |                    |                    |                    | Rectal                              |
| Gomez et al.       | 2003  | Ecuador               | Artesunate              | Mefloquine                          | 3.9-9.5                                  |                                       | 1-3           | 6                   | Yes        | 50          |                    |                    |                    | Rectal                              |
| Grande et al.      | 2007  | Peru                  | Artesunate              | Mefloquine                          | 4                                        |                                       | 1             | 3                   | Yes        | 260         | 41.5               | 3.8                | 0                  |                                     |
| Grande et al.      | 2007  | Peru                  | Dihydroartemisinin      | Piperaquine                         | 2.1                                      |                                       | 1             | 3                   | Yes        | 262         | 32.3               | 1.1                | 0                  |                                     |
| Grandesso et al.   | 2006  | Sierra Leone          | Artesunate              | Amodiaquine                         | 4                                        |                                       | 1             | 3                   | Yes        | 126         |                    |                    | 5.8                |                                     |
| Guthmann et al.    | 2005  | Angola                | Artesunate              | Amodiaquine                         | 4                                        |                                       | 1             | 3                   | Yes        | 97          |                    |                    |                    |                                     |
| Guthmann et al.    | 2005  | Angola                | Artesunate              | Sulfadoxine+Pyrimethamine           | 4                                        |                                       | 1             | 3                   | Yes        | 90          |                    |                    |                    |                                     |
| Gutman et al.      | 2009  | Peru                  | Artesunate              | Mefloquine                          | 4                                        |                                       | 1             | 3                   | Yes        | 39          |                    |                    | 2.6                |                                     |
| Hamour et al.      | 2005  | Sudan                 | Artesunate              | Amodiaquine                         | 4                                        |                                       | 1             | 3                   | Yes        | 80          |                    |                    | 1.1                |                                     |
| Hamour et al.      | 2005  | Sudan                 | Artesunate              | Sulfadoxine+Pyrimethamine           | 4                                        |                                       | 1             | 3                   | Yes        | 81          |                    |                    | 1.2                |                                     |
| Haque et al.       | 2007  | Bangladesh            | Artemether              | Lumefantrine                        |                                          | 160                                   | 2             | 3                   | Yes        | 67          | 16.42              |                    |                    |                                     |
| Hasugian et al.    | 2007  | Indonesia             | Artesunate              | Amodiaquine                         | 4                                        |                                       | 1             | 3                   | Yes        | 166         |                    | 0                  | 0                  |                                     |
| Hasugian et al.    | 2007  | Indonesia             | Dihydroartemisinin      | Piperaquine                         | 2.25                                     |                                       | 1             | 3                   | Yes        | 168         |                    | 0                  | 0                  |                                     |
| Hatz et al.        | 2008  | Europe and Colombia   | Artemether              | Lumefantrine                        |                                          | 160                                   | 2             | 3                   | Not stated | 165         | 76.2               | 50.8               |                    |                                     |
| Hien et al.        | 2004  | Vietnam               | Artesunate              | Mefloquine                          | 4                                        |                                       | 1             | 3                   | Yes        | 77          |                    | 22                 |                    |                                     |
| Hien et al.        | 2004  | Vietnam               | Artesunate              | Mefloquine                          | 4                                        |                                       | 1             | 3                   | Yes        | 38          |                    |                    |                    |                                     |
| Hien et al.        | 2004  | Vietnam               | Dihydroartemisinin      | Piperaquine                         | 1.7-3.4                                  |                                       | 1-2           | 3                   | Yes        | 166         |                    | 27                 |                    |                                     |
| Hien et al.        | 2004  | Vietnam               | Dihydroartemisinin      | Trimethoprim+Piperaquine            | 1.2-2.4                                  |                                       | 1-2           | 3                   | Yes        | 76          |                    |                    |                    |                                     |
| Hien et al.        | 2004  | Vietnam               | Dihydroartemisinin      | Trimethoprim+Piperaquine            | 1.33-2.66                                |                                       | 1-2           | 3                   | Yes        | 157         |                    | 32                 |                    |                                     |
| Hombhanje et al.   | 2009  | Papua New Guinea      | Artemisinin             | Naphthoquine                        |                                          | 1000                                  | 1             | 1                   | Yes        | 51          | 51                 | 8                  | 2                  | PPR derived from figure             |
| Hung et al.        | 2004  | Vietnam               | Artesunate              | Mefloquine                          | 4                                        |                                       | 1             | 1                   | Yes        | 110         |                    |                    |                    |                                     |
| Hung et al.        | 2004  | Vietnam               | Artesunate              | Mefloquine                          | 4                                        |                                       | 1             | 1                   | Yes        | 113         |                    |                    |                    |                                     |
| Hung et al.        | 2004  | Vietnam               | Artesunate              | Mefloquine                          | 4                                        |                                       | 1             | 1                   | Yes        | 114         |                    |                    |                    |                                     |
| Huong et al.       | 2001  | Vietnam               | Artesunate              |                                     | 2-4                                      |                                       | 1             | 5                   | Yes        | 25          |                    |                    |                    |                                     |
| Hutagalung et al.  | 2005  | Thailand              | Artemether              | Lumefantrine                        | 2.7-4.6                                  |                                       | 2             | 3                   | Yes        | 245         | 73.6               | 13.2               | 0.8                |                                     |
| Hutagalung et al.  | 2005  | Thailand              | Artesunate              | Mefloquine                          | 4                                        |                                       | 1             | 3                   | Yes        | 245         | 66.9               | 14                 | 1.7                |                                     |
| Hwang et al.       | 2011  | Ethiopia              | Artemether              | Lumefantrine                        | 4.6-8                                    |                                       | 2             | 3                   | Partial    | 120         |                    | 6.9                | 0.9                |                                     |
| Ibrahim et al.     | 2007  | Sudan                 | Artesunate              | Amodiaquine                         | 4                                        |                                       | 1             | 3                   | Yes        | 42          | 31                 |                    | 2.4                |                                     |
| Ibrahim et al.     | 2007  | Sudan                 | Artesunate              | Sulfadoxine+Pyrimethamine           | 4                                        |                                       | 1             | 3                   | Yes        | 40          | 20                 |                    | 0                  |                                     |
| Janssens et al.    | 2007  | Cambodia              | Artesunate              | Mefloquine                          | 4                                        |                                       | 1             | 3                   | Yes        | 236         | 51                 | 6                  |                    |                                     |
| Janssens et al.    | 2007  | Cambodia              | Dihydroartemisinin      | Piperaquine                         | 1.6-3.2                                  |                                       | 1-2           | 3                   | Yes        | 228         | 38                 | 6                  |                    |                                     |
| Juma et al.        | 2008  | Kenya                 | Artemether              | Lumefantrine                        | Not specified                            |                                       | 1             | 3                   | Yes        | 121         | 95                 | 36                 | 0                  | Suspension; PPR derived from figure |
| Juma et al.        | 2008  | Kenya                 | Artemether              | Lumefantrine                        | Not specified                            |                                       | 2             | 3                   | Yes        | 124         | 95                 | 38                 | 0                  | PPR derived from figure             |
| Kabanyanyi et al.  | 2007  | Tanzania              | Artesunate              | Amodiaquine                         | 4                                        |                                       | 1             | 3                   | Yes        | 76          |                    |                    |                    |                                     |
| Kabanyanyi et al.  | 2007  | Tanzania              | Artemether              | Lumefantrine                        | 3.3-8                                    |                                       | 2             | 3                   | Yes        | 99          |                    |                    |                    |                                     |
| Kanya et al.       | 2007  | Uganda                | Artemether              | Lumefantrine                        | 4.6-8                                    |                                       | 2             | 3                   | Yes        | 210         |                    | 1                  | 0                  |                                     |
| Kanya et al.       | 2007  | Uganda                | Dihydroartemisinin      | Piperaquine                         | 2.1                                      |                                       | 1             | 3                   | Yes        | 211         |                    | 0.5                | 0                  |                                     |
| Karema et al.      | 2006  | Rwanda                | Artesunate              | Amodiaquine                         | 4                                        |                                       | 1             | 3                   | Yes        | 252         |                    | 11.2               | 0.8                |                                     |
| Karema et al.      | 2006  | Rwanda                | Dihydroartemisinin      | Piperaquine                         | 1.6-3.1                                  |                                       | 1             | 3                   | Yes        | 252         |                    | 6                  | 0.4                |                                     |
| Karunajeewa et al. | 2008b | Papua New Guinea      | Artemether              | Lumefantrine                        | 3.4                                      |                                       | 2             | 3                   | Partial    | 127         |                    |                    |                    |                                     |
| Karunajeewa et al. | 2008a | Papua New Guinea      | Dihydroartemisinin      | Piperaquine                         | 2.5                                      |                                       | 1             | 3                   | Yes        | 22          |                    |                    |                    |                                     |
| Karunajeewa et al. | 2008b | Papua New Guinea      | Dihydroartemisinin      | Piperaquine                         | 2.5                                      |                                       | 1             | 3                   | Yes        | 123         |                    |                    |                    |                                     |
| Karunajeewa et al. | 2008b | Papua New Guinea      | Artesunate              | Sulfadoxine+Pyrimethamine           | 4                                        |                                       | 1             | 3                   | Yes        | 122         |                    |                    |                    |                                     |
| Karunajeewa et al. | 2003  | Papua New Guinea      | Artesunate              |                                     | 12.5 +/- 0.7                             |                                       | 2             | 1                   | Yes        | 12          | 0                  | 0                  | 0                  | Rectal                              |
| Karunajeewa et al. | 2003  | Papua New Guinea      | Artesunate              |                                     | 12.9 +/- 0.9                             |                                       | 2             | 1                   | Yes        | 30          | 3.3                |                    |                    | Rectal                              |

Additional File 5 : Parasite Prevalence Rates

| Authors             | Year | Country                           | Artemisinin Derivatives | Partner Drug              | Artemisinin Derivatives Dose (mg/kg/day) | Artemisinin Derivatives Dose (mg/day) | Doses Per Day | Days of Artemisinin | Supervised | Sample Size | D1 Parasitemic (%) | D2 Parasitemic (%) | D3 Parasitemic (%) | Comments                |
|---------------------|------|-----------------------------------|-------------------------|---------------------------|------------------------------------------|---------------------------------------|---------------|---------------------|------------|-------------|--------------------|--------------------|--------------------|-------------------------|
| Kayentao et al.     | 2009 | Mali                              | Artesunate              | Amodiaquine               | 4                                        |                                       | 1             | 3                   | Yes        | 133         |                    | 10.5               | 1.5                |                         |
| Kayentao et al.     | 2009 | Mali                              | Artesunate              | Sulfadoxine+Pyrimethamine | 4                                        |                                       | 1             | 3                   | Yes        | 132         |                    | 10.7               | 0.8                |                         |
| Kobbe et al.        | 2008 | Ghana                             | Artesunate              | Amodiaquine               |                                          | 25-100                                | 1             | 3                   | Partial    | 123         |                    |                    |                    |                         |
| Kobbe et al.        | 2008 | Ghana                             | Artemether              | Lumefantrine              | 3.5-8                                    |                                       | 2             | 3                   | Partial    | 123         |                    |                    |                    |                         |
| Kofoed et al.       | 2003 | Guinea-Bissau                     | Artesunate              | Chloroquine               | 2-4                                      |                                       | 1-2           | 3                   | Yes        | 119         |                    | 10                 |                    |                         |
| Kofoed et al.       | 2003 | Guinea-Bissau                     | Artesunate              | Chloroquine               | 2-4                                      |                                       | 1-2           | 3                   | Yes        | 120         |                    | 11                 |                    | Sequential              |
| Kofoed et al.       | 2003 | Guinea-Bissau                     | Artesunate              | Chloroquine               | 2-4                                      |                                       | 1-2           | 3                   | Yes        | 115         |                    | 6                  |                    |                         |
| Koram et al.        | 2005 | Ghana                             | Artesunate              | Amodiaquine               | 4                                        |                                       | 1             | 3                   | Yes        | 54          | 40                 | 2                  | 0                  | PPR derived from figure |
| Koram et al.        | 2008 | Ghana                             | Artesunate              | Amodiaquine               | 4                                        |                                       | 1             | 3                   | Yes        | 545         |                    |                    |                    |                         |
| Koram et al.        | 2005 | Ghana                             | Artemether              | Lumefantrine              | Not specified                            |                                       | 2             | 3                   | Yes        | 51          | 64                 | 0                  | 0                  | PPR derived from figure |
| Krudsood et al.     | 2000 | Thailand                          | Artesunate              | Azithromycin              |                                          | 200                                   | 1             | 3                   | Yes        | 67          |                    |                    |                    |                         |
| Krudsood et al.     | 2007 | Thailand                          | Artemether              | Lumefantrine              | 3.2                                      |                                       | 2             | 3                   | Yes        | 94          |                    |                    |                    |                         |
| Krudsood et al.     | 2003 | Thailand                          | Artemether              | Lumefantrine              | 4.6                                      |                                       | 2             | 3                   | Yes        | 41          |                    |                    |                    |                         |
| Krudsood et al.     | 2007 | Thailand                          | Artesunate              | Mefloquine                | 4                                        |                                       | 1             | 3                   | Yes        | 27          |                    |                    |                    |                         |
| Krudsood et al.     | 2002 | Thailand                          | Artesunate              | Mefloquine                | 4-5                                      |                                       | 1             | 3                   | Yes        | 102         |                    |                    |                    | Sequential              |
| Krudsood et al.     | 2002 | Thailand                          | Artesunate              | Mefloquine                | 4-5                                      |                                       | 1             | 3                   | Yes        | 102         |                    |                    |                    | Simultaneous            |
| Krudsood et al.     | 2000 | Thailand                          | Artesunate              | Mefloquine                |                                          | 200                                   | 1             | 3                   | Yes        | 67          |                    |                    |                    |                         |
| Krudsood et al.     | 2003 | Thailand                          | Dihydroartemisinin      | Naphthoquine+Trimethoprim |                                          | 320                                   | 2             | 1                   | Yes        | 89          |                    |                    |                    |                         |
| Krudsood et al.     | 2007 | Thailand                          | Dihydroartemisinin      | Piperaquine               | 2                                        |                                       | 1             | 3                   | Yes        | 97          |                    |                    |                    |                         |
| Krudsood et al.     | 2007 | Thailand                          | Artemisinin             | Piperaquine               | 2.4                                      |                                       | 1             | 2                   | Yes        | 17          |                    |                    |                    |                         |
| Krudsood et al.     | 2007 | Thailand                          | Artemisinin             | Piperaquine               | 2.5                                      |                                       | 1             | 2                   | Yes        | 78          |                    |                    |                    |                         |
| Krudsood et al.     | 2007 | Thailand                          | Artemisinin             | Piperaquine               | 3.2                                      |                                       | 1             | 3                   | Yes        | 61          |                    |                    |                    |                         |
| Krudsood et al.     | 2007 | Thailand                          | Artemisinin             | Piperaquine               | 3.2-6.4                                  |                                       | 1-2           | 2                   | Yes        | 37          |                    |                    |                    |                         |
| Krudsood et al.     | 2000 | Thailand                          | Artesunate              |                           |                                          | 200                                   | 1             | 3                   | Yes        | 68          |                    |                    |                    |                         |
| Kshirsagar et al.   | 2000 | India                             | Artemether              | Lumefantrine              |                                          | 20-60                                 | 1-3           | 3                   | Yes        | 89          |                    |                    |                    |                         |
| Lefevre et al.      | 2001 | Thailand                          | Artemether              | Lumefantrine              | 4.6                                      |                                       | 2             | 3                   | Yes        | 164         | 60                 | 5                  | 0                  |                         |
| Lefevre et al.      | 2001 | Thailand                          | Artesunate              | Mefloquine                | 4                                        |                                       | 1             | 3                   | Yes        | 55          | 60                 | 5                  | 0                  |                         |
| Marquino et al.     | 2003 | Peru                              | Artesunate              | Mefloquine                | 4                                        |                                       | 1             | 3                   | Yes        | 51          |                    | 17.7               | 2                  |                         |
| Marquino et al.     | 2005 | Peru                              | Artesunate              | Sulfadoxine+Pyrimethamine | 4                                        |                                       | 1             | 3                   | Yes        | 94          |                    |                    | 2.2                |                         |
| Martensson et al.   | 2005 | Tanzania                          | Artesunate              | Amodiaquine               | 4                                        |                                       | 1             | 3                   | Yes        | 207         | 66                 | 10                 | 0                  |                         |
| Martensson et al.   | 2005 | Tanzania                          | Artemether              | Lumefantrine              | 3.2-4.4                                  |                                       | 2             | 3                   | Yes        | 200         | 83                 | 10                 | 0                  |                         |
| Massougbodji et al. | 2002 | Benin, Cameroon, Ivory Coast      | Artesunate              | Mefloquine                | 4.27                                     |                                       | 1             | 3                   | Yes        | 52          |                    | 34                 | 0                  | Simultaneous            |
| Massougbodji et al. | 2002 | Benin, Cameroon, Ivory Coast      | Artesunate              | Mefloquine                | 4.43                                     |                                       | 1             | 3                   | Yes        | 52          |                    | 35                 | 0                  | Sequential              |
| Mayxay et al.       | 2004 | The Lao PDR                       | Artemether              | Lumefantrine              | 4-4.6                                    |                                       | 2             | 3                   | Yes        | 110         |                    |                    |                    |                         |
| Mayxay et al.       | 2004 | The Lao PDR                       | Artesunate              | Mefloquine                | 4                                        |                                       | 1             | 3                   | Yes        | 110         |                    |                    |                    |                         |
| Mayxay et al.       | 2006 | The Lao PDR                       | Artesunate              | Mefloquine                | 4                                        |                                       | 1             | 3                   | Yes        | 110         |                    |                    |                    |                         |
| Mayxay et al.       | 2006 | The Lao PDR                       | Dihydroartemisinin      | Piperaquine               | 2.1                                      |                                       | 1             | 3                   | Yes        | 110         |                    |                    |                    |                         |
| Menan et al.        | 2011 | Cameroon, Ivory Coast and Senegal | Artemether              | Lumefantrine              | Not specified                            |                                       | 2             | 3                   | Yes        | 197         | 43                 | 10                 |                    |                         |
| Menan et al.        | 2011 | Cameroon, Ivory Coast and Senegal | Dihydroartemisinin      | Piperaquine+Trimethoprim  | 3.2                                      |                                       | 2             | 2                   | Yes        | 206         | 41                 | 3.9                |                    |                         |
| Ménard et al.       | 2007 | Madagascar                        | Artesunate              | Amodiaquine               | 4                                        |                                       | 1             | 3                   | Yes        | 83          | 67                 | 11                 | 2                  |                         |
| Ménard et al.       | 2008 | Madagascar                        | Artesunate              | Amodiaquine               | 4                                        |                                       | 1             | 3                   | Yes        | 346         | 62                 | 12                 | 2.9                | PPR derived from figure |
| Mens et al.         | 2008 | Kenya                             | Artemether              | Lumefantrine              | 3.5-8                                    |                                       | 2             | 3                   | Partial    | 73          |                    | 0                  | 0                  |                         |
| Mens et al.         | 2008 | Kenya                             | Dihydroartemisinin      | Piperaquine               | 2.3-2.5                                  |                                       | 1             | 3                   | Yes        | 73          |                    | 1.5                | 0                  |                         |
| Meremikwu et al.    | 2006 | Nigeria                           | Artesunate              | Amodiaquine               | 4                                        |                                       | 1             | 3                   | Yes        | 59          |                    |                    |                    |                         |
| Meremikwu et al.    | 2006 | Nigeria                           | Artemether              | Lumefantrine              | 3.5-8                                    |                                       | 2             | 3                   | Yes        | 60          |                    |                    |                    |                         |
| Michael et al.      | 2010 | Nigeria                           | Artesunate              | Amodiaquine               | 4                                        |                                       | 1             | 3                   | Yes        | 90          | 16                 | 1                  | 0                  | PPR derived from figure |
| Michael et al.      | 2010 | Nigeria                           | Artemether              | Lumefantrine              | 3.5-8                                    |                                       | 2             | 3                   | Yes        | 93          | 15                 | 0                  | 0                  | PPR derived from figure |
| Mockenhaupt et al.  | 2005 | Ghana                             | Artesunate              | Sulfadoxine+Pyrimethamine | 4                                        |                                       | 1             | 3                   | Yes        | 145         |                    | 20                 | 2                  | PPR derived from figure |
| Mohamed et al.      | 2006 | Sudan                             | Artemether              | Lumefantrine              | 3                                        |                                       | 2             | 3                   | Yes        | 72          |                    | 0                  | 0                  |                         |
| Mohamed et al.      | 2006 | Sudan                             | Artesunate              | Sulfadoxine+Pyrimethamine | 4                                        |                                       | 1             | 3                   | Yes        | 71          |                    | 0                  | 0                  |                         |
| Mukhtar et al.      | 2007 | Sudan                             | Artemether              | Lumefantrine              | Not specified                            |                                       |               |                     | Partial    | 80          |                    |                    |                    |                         |
| Mukhtar et al.      | 2007 | Sudan                             | Artesunate              | Sulfadoxine+Pyrimethamine | Not specified                            |                                       |               |                     | Yes        | 80          |                    |                    |                    |                         |
| Mulenga et al.      | 2006 | Zambia                            | Artemether              | Lumefantrine              |                                          | 160                                   | 2             | 3                   | Partial    | 485         |                    |                    | 0.7                |                         |
| Mutabingwa et al.   | 2005 | Tanzania                          | Artesunate              | Amodiaquine               | 4                                        |                                       | 1             | 3                   | No         | 515         |                    |                    |                    |                         |
| Mutabingwa et al.   | 2005 | Tanzania                          | Artemether              | Lumefantrine              | 4-4.6                                    |                                       | 2             | 3                   | No         | 519         |                    |                    |                    |                         |
| Na-Bangchang et al. | 2010 | Thailand                          | Artesunate              | Mefloquine                | 4                                        |                                       | 1             | 3                   | Yes        | 150         |                    | 0                  | 0                  |                         |
| Nahum et al.        | 2007 | Benin                             | Artesunate              | Sulfadoxine+Pyrimethamine | 4                                        |                                       | 1             | 3                   | Yes        | 81          |                    |                    | 5.1                |                         |
| Nambei et al.       | 2005 | Central Republic of Africa        | Dihydroartemisinin      | Piperaquine+Trimethoprim  |                                          | 96                                    | 3             | 1                   | Partial    | 54          |                    |                    |                    |                         |
| Nambozi et al.      | 2011 | Zambia                            | Artemether              | Lumefantrine              | 3.5-8                                    |                                       | 2             | 3                   | Yes        | 101         |                    |                    |                    |                         |

Additional File 5 : Parasite Prevalence Rates

| Authors                 | Year  | Country                          | Artemisinin Derivatives | Partner Drug                        | Artemisinin Derivatives Dose (mg/kg/day) | Artemisinin Derivatives Dose (mg/day) | Doses Per Day | Days of Artemisinin | Supervised | Sample Size | D1 Parasitemic (%) | D2 Parasitemic (%) | D3 Parasitemic (%) | Comments                            |
|-------------------------|-------|----------------------------------|-------------------------|-------------------------------------|------------------------------------------|---------------------------------------|---------------|---------------------|------------|-------------|--------------------|--------------------|--------------------|-------------------------------------|
| Nambozi et al.          | 2011  | Zambia                           | Dihydroartemisinin      | Piperaquine                         | 2.25                                     |                                       | 1             | 3                   | Yes        | 203         |                    |                    |                    |                                     |
| Ndayiragije et al.      | 2004  | Burundi                          | Artesunate              | Amodiaquine                         | 4                                        |                                       | 1             | 3                   | Yes        | 153         |                    |                    |                    |                                     |
| Ndayiragije et al.      | 2004  | Burundi                          | Artemether              | Lumefantrine                        | 3.2-4                                    |                                       | 2             | 3                   | Yes        | 142         |                    |                    |                    |                                     |
| Ndiaye et al.           | 2009  | Cameroon, Madagascar, Mali and   | Artesunate              | Amodiaquine                         | Not specified                            |                                       | 2             | 3                   | Yes        | 315         | 61.8               | 7.7                | 0.6                |                                     |
| Ndiaye et al.           | 2009  | Cameroon, Madagascar, Mali and   | Artesunate              | Amodiaquine                         | Not specified                            |                                       | 1             | 3                   | Yes        | 313         | 64.7               | 8.6                | 0                  |                                     |
| Ndiaye et al.           | 2008  | Senegal and Cameroon             | Artesunate              | Amodiaquine                         |                                          | 50-200                                | 2             | 3                   | Yes        | 155         |                    |                    |                    |                                     |
| Ndiaye et al.           | 2008  | Senegal and Cameroon             | Artesunate              | Amodiaquine                         |                                          | 50-200                                | 1             | 3                   | Yes        | 161         |                    |                    |                    |                                     |
| Ndiaye et al.           | 2009  | Cameroon, Madagascar, Mali and   | Artemether              | Lumefantrine                        | Not specified                            |                                       | 2             | 3                   | Yes        | 312         | 66.5               | 8.1                | 1.3                |                                     |
| Ngasala et al.          | 2011b | Tanzania                         | Artemether              | Lumefantrine                        | 3.3-8                                    |                                       | 2             | 3                   | No         | 179         |                    |                    |                    | Unsupervised                        |
| Ngasala et al.          | 2011a | Tanzania                         | Artemether              | Lumefantrine                        | 3.3-8                                    |                                       | 2             | 3                   | Partial    | 244         |                    |                    |                    | Unsupervised                        |
| Ngasala et al.          | 2011b | Tanzania                         | Artemether              | Lumefantrine                        | 3.3-8                                    |                                       | 2             | 3                   | Yes        | 180         | 71.3               | 6.7                | 1.1                |                                     |
| Nguyen et al.           | 2003  | Vietnam                          | Artesunate              | Chloroquine                         | 2-4                                      |                                       | 1             | 3                   | Yes        | 28          |                    |                    |                    |                                     |
| Nguyen et al.           | 2003  | Vietnam                          | Artesunate              | Chloroquine                         | 2-4                                      |                                       | 1             | 3                   | Yes        | 33          |                    |                    |                    |                                     |
| Nguyen et al.           | 2003  | Vietnam                          | Artesunate              | Sulfadoxine+Pyrimethamine           | 2-4                                      |                                       | 1             | 3                   | Yes        | 29          |                    |                    |                    |                                     |
| Nguyen et al.           | 2003  | Vietnam                          | Artesunate              | Sulfadoxine+Pyrimethamine           | 2-4                                      |                                       | 1             | 3                   | Yes        | 33          |                    |                    |                    |                                     |
| Noedl et al.            | 2006  | Thailand                         | Artesunate              | Azithromycin                        |                                          | 200                                   | 2             | 3                   | Yes        | 27          |                    |                    |                    |                                     |
| Noedl et al.            | 2006  | Thailand                         | Artesunate              | Azithromycin                        |                                          | 200                                   | 1             | 3                   | Yes        | 27          |                    |                    |                    |                                     |
| Noedl et al.            | 2010  | Cambodia                         | Artesunate              |                                     | 4                                        |                                       | 1             | 7                   | Yes        | 60          |                    | 47.9               | 21.9               |                                     |
| Obonyo et al.           | 2003  | Kenya                            | Artesunate              | Sulfadoxine+Pyrimethamine           | 4                                        |                                       | 1             | 1                   | Yes        | 200         | 64                 | 20                 | 4                  | PPR derived from figure             |
| Obonyo et al.           | 2003  | Kenya                            | Artesunate              | Sulfadoxine+Pyrimethamine           | 4                                        |                                       | 1             | 3                   | Yes        | 200         | 64                 | 10                 | 2                  | PPR derived from figure             |
| Oduro et al.            | 2008  | Ghana                            | Artesunate              | Amodiaquine                         | 4                                        |                                       | 1             | 3                   | No         | 154         |                    |                    | 0                  | Unsupervised; PPR derived from      |
| Oduro et al.            | 2008  | Ghana                            | Artesunate              | Amodiaquine                         | 4                                        |                                       | 1             | 3                   | Yes        | 154         |                    |                    | 0                  | Supervised; PPR derived from figure |
| Oduro et al.            | 2004  | Ghana                            | Beta-artemether         |                                     |                                          | 80-240                                | 1-2           | 4                   | Partial    | 117         |                    |                    | 7                  |                                     |
| Oduro et al.            | 2004  | Ghana                            | Beta-artemether         |                                     |                                          | 80-160                                | 1-2           | 5                   | Partial    | 106         |                    |                    |                    |                                     |
| Osorio et al.           | 2007  | Colombia                         | Artesunate              | Amodiaquine                         | 4                                        |                                       | 1             | 3                   | Yes        | 42          |                    |                    |                    |                                     |
| Owusu-Agyei et al.      | 2008  | Ghana                            | Artesunate              | Amodiaquine                         | Not specified                            |                                       |               |                     | Yes        | 178         |                    |                    |                    |                                     |
| Owusu-Agyei et al.      | 2008  | Ghana                            | Artesunate              | Chlorproguanil+Dapsone              | Not specified                            |                                       |               |                     | Yes        | 178         |                    |                    |                    |                                     |
| Owusu-Agyei et al.      | 2008  | Ghana                            | Artemether              | Lumefantrine                        | Not specified                            |                                       |               |                     | Yes        | 177         |                    |                    |                    |                                     |
| Oyakhrome et al.        | 2007  | Gabon                            | Artesunate              | Amodiaquine                         | 4                                        |                                       | 1             | 3                   | No         | 32          |                    |                    |                    | Unsupervised                        |
| Oyakhrome et al.        | 2007  | Gabon                            | Artesunate              | Amodiaquine                         | 4                                        |                                       | 1             | 3                   | Yes        | 29          |                    |                    |                    | Supervised                          |
| Penali et al.           | 2008  | Ivory Coast                      | Artesunate              | Sulfamethoxypyrazine+Pyrimethamine  | 5-10                                     |                                       | 1             | 3                   | Yes        | 111         | 0                  |                    | 0                  |                                     |
| Penali et al.           | 2008  | Ivory Coast                      | Artesunate              | Sulfamethoxypyrazine+Pyrimethamine  | 5-20                                     |                                       | 1-2           | 2                   | Yes        | 110         | 0                  |                    | 0                  |                                     |
| Piola et al.            | 2005  | Uganda                           | Artemether              | Lumefantrine                        | 4-4.6                                    |                                       | 2             | 3                   | Partial    | 615         |                    |                    |                    | Unsupervised                        |
| Piola et al.            | 2005  | Uganda                           | Artemether              | Lumefantrine                        | 4-4.6                                    |                                       | 2             | 3                   | Yes        | 313         |                    |                    |                    | Supervised                          |
| Premji et al.           | 2009  | Burkina Faso, Ghana, Kenya, Nige | Artesunate              | Chlorproguanil+Dapsone              | 4                                        |                                       | 1             | 3                   | Yes        | 914         |                    |                    |                    |                                     |
| Premji et al.           | 2009  | Burkina Faso, Ghana, Kenya, Nige | Artemether              | Lumefantrine                        | 4.6-8                                    |                                       | 2             | 3                   | Yes        | 458         |                    |                    |                    |                                     |
| Priotto et al.          | 2003  | Uganda                           | Artesunate              | Sulfadoxine+Pyrimethamine           | 4                                        |                                       | 1             | 1                   | Yes        | 126         | 95                 | 50                 | 36.8               |                                     |
| Priotto et al.          | 2003  | Uganda                           | Artesunate              | Sulfadoxine+Pyrimethamine           | 4                                        |                                       | 1             | 3                   | Yes        | 126         | 86                 | 28                 | 3.5                |                                     |
| Pukrittayakamee et al.  | 2004  | Thailand                         | Artesunate              | Primaquine                          | 1.65-3.3                                 |                                       | 1             | 7                   | Yes        | 27          |                    |                    |                    |                                     |
| Pukrittayakamee et al.  | 2004  | Thailand                         | Artesunate              | Primaquine                          | 1.65-3.3                                 |                                       | 1             | 7                   | Yes        | 23          |                    |                    |                    |                                     |
| Rahman et al.           | 2008  | Bangladesh                       | Artemether              | Lumefantrine                        | 4.6-8                                    |                                       | 2             | 3                   | No         | 160         |                    |                    |                    | Unsupervised                        |
| Rahman et al.           | 2008  | Bangladesh                       | Artemether              | Lumefantrine                        | 4.6-8                                    |                                       | 2             | 3                   | Yes        | 160         |                    |                    |                    | Supervised                          |
| Ramharter et al.        | 2005  | Gabon                            | Artesunate              | Clindamycin                         | 4                                        |                                       | 2             | 3                   | Yes        | 50          |                    |                    |                    |                                     |
| Rasheed et al.          | 2011  | Liberia                          | Artemether              | Lumefantrine                        | 4.6-8                                    |                                       | 2             | 3                   | Yes        | 100         |                    |                    |                    |                                     |
| Ratcliff et al.         | 2007  | Indonesia                        | Artemether              | Lumefantrine                        | 4-4.6                                    |                                       | 2             | 3                   | Partial    | 375         | 43                 | 3                  |                    |                                     |
| Ratcliff et al.         | 2007  | Indonesia                        | Dihydroartemisinin      | Piperaquine                         | 2.25                                     |                                       | 1             | 3                   | Yes        | 379         | 27                 | 3                  |                    |                                     |
| Rojanawatsirivej et al. | 2003  | Thailand                         | Artemether              | Lumefantrine+Primaquine             | 4.6                                      |                                       | 2             | 3                   | Not stated | 33          |                    |                    |                    |                                     |
| Rojanawatsirivej et al. | 2003  | Thailand                         | Artesunate              | Mefloquine+Primaquine               | 4                                        |                                       | 1             | 3                   | Not stated | 46          |                    |                    | 2.17               |                                     |
| Rojanawatsirivej et al. | 2003  | Thailand                         | Artesunate              | Mefloquine+Primaquine               | 4                                        |                                       | 1             | 3                   | Not stated | 153         |                    |                    |                    |                                     |
| Rulisa et al.           | 2007  | Rwanda                           | Artesunate              | Sulfadoxine+Pyrimethamine           | 4                                        |                                       | 1             | 3                   | Yes        | 103         |                    |                    |                    |                                     |
| Rulisa et al.           | 2007  | Rwanda                           | Artesunate              | Sulfamethoxypyrazine+Pyrimethamine  | 4                                        |                                       | 1             | 3                   | Yes        | 109         |                    |                    |                    |                                     |
| Rwagacondo et al.       | 2004  | Rwanda                           | Artesunate              | Amodiaquine                         | 4                                        |                                       | 1             | 3                   | Yes        | 158         |                    |                    |                    |                                     |
| Rwagacondo et al.       | 2003  | Rwanda                           | Artesunate              | Sulfadoxine+Pyrimethamine           | 4                                        |                                       | 1             | 3                   | Yes        | 144         |                    |                    |                    |                                     |
| Sagara et al.           | 2006  | Mali                             | Artemether              | Lumefantrine                        | 4.6-8                                    |                                       | 1-2           | 3                   | Yes        | 303         |                    | 2.6                | 0                  |                                     |
| Sagara et al.           | 2008  | Mali                             | Artemether              | Lumefantrine                        | 4.6-8                                    |                                       | 2             | 3                   | Yes        | 235         | 67.9               | 2.1                | 0                  |                                     |
| Sagara et al.           | 2009  | Cameroon, Mali, Rwanda and Su    | Artemether              | Lumefantrine                        | 4.6-8                                    |                                       | 2             | 3                   | Yes        | 450         | 48.2               | 9.2                | 0.8                |                                     |
| Sagara et al.           | 2008  | Mali                             | Artesunate              | Mefloquine                          | 4                                        |                                       | 1             | 3                   | Yes        | 235         | 65.2               | 2.6                | 0                  |                                     |
| Sagara et al.           | 2006  | Mali                             | Artesunate              | Sulfamethoxypyrazine+Pyrimethamine  | 4                                        |                                       | 1             | 3                   | Yes        | 303         |                    | 0.7                | 0.7                |                                     |
| Sagara et al.           | 2009  | Cameroon, Mali, Rwanda and Su    | Artesunate              | Sulphamethoxypyrazine+Pyrimethamine | 3.8-10                                   |                                       | 1-2           | 2                   | Yes        | 458         | 38.8               | 9                  | 1                  |                                     |

Additional File 5 : Parasite Prevalence Rates

| Authors               | Year  | Country                          | Artemisinin Derivatives | Partner Drug                        | Artemisinin Derivatives Dose (mg/kg/day) | Artemisinin Derivatives Dose (mg/day) | Doses Per Day | Days of Artemisinin | Supervised | Sample Size | D1 Parasitemic (%) | D2 Parasitemic (%) | D3 Parasitemic (%) | Comments                |
|-----------------------|-------|----------------------------------|-------------------------|-------------------------------------|------------------------------------------|---------------------------------------|---------------|---------------------|------------|-------------|--------------------|--------------------|--------------------|-------------------------|
| Sagara et al.         | 2009  | Cameroon, Mali, Rwanda and Su    | Artesunate              | Sulphamethoxypyrazine+Pyrimethamine | 3.8-5                                    |                                       | 1             | 3                   | Yes        | 476         | 52.5               | 9.5                | 0.5                |                         |
| Schwarz et al.        | 2005  | Gabon                            | Artesunate              |                                     | 2-4                                      |                                       | 1             | 5                   | Partial    | 50          |                    |                    |                    |                         |
| Silachamroon et al.   | 2005  | Thailand                         | Artesunate              | Mefloquine                          | 4                                        |                                       | 1             | 3                   | Yes        | 60          |                    |                    | 0                  |                         |
| Silachamroon et al.   | 2005  | Thailand                         | Artesunate              | Mefloquine                          | 4                                        |                                       | 1             | 3                   | Yes        | 60          |                    |                    | 0                  |                         |
| Sirima et al.         | 2009  | Burkina Faso                     | Artesunate              | Amodiaquine                         | 4                                        |                                       | 1             | 3                   | Yes        | 375         |                    | 2                  |                    | Loose                   |
| Sirima et al.         | 2009  | Burkina Faso                     | Artesunate              | Amodiaquine                         | 4                                        |                                       | 1             | 3                   | Yes        | 375         |                    | 2.3                |                    | Fixed Dose              |
| Sirima et al.         | 2003  | Burkina Faso                     | Artesunate              | Chloroquine                         | 4                                        |                                       | 1             | 3                   | Yes        | 150         | 78                 | 20                 | 4                  | PPR derived from figure |
| Sirivichayakul et al. | 2007  | Thailand                         | Artesunate              | Mefloquine                          | 10                                       |                                       | 1             | 3                   | Yes        | 35          |                    |                    | 0                  | Rectal                  |
| Sirivichayakul et al. | 2007  | Thailand                         | Artesunate              | Mefloquine                          | 20                                       |                                       | 1             | 3                   | Yes        | 35          |                    |                    | 0                  | Rectal                  |
| Smithuis et al.       | 2010  | Myanmar                          | Artesunate              | Amodiaquine                         | 4                                        |                                       | 1             | 3                   | Partial    | 155         |                    |                    |                    |                         |
| Smithuis et al.       | 2010  | Myanmar                          | Artemether              | Lumefantrine                        | 3.3                                      |                                       | 2             | 3                   | Partial    | 162         |                    |                    |                    |                         |
| Smithuis et al.       | 2006  | Myanmar                          | Artesunate              | Mefloquine                          | 4                                        |                                       | 1             | 3                   | No         | 162         |                    |                    |                    | Unsupervised            |
| Smithuis et al.       | 2004a | Myanmar                          | Artesunate              | Mefloquine                          | 4                                        |                                       | 1             | 3                   | No         | 196         |                    |                    |                    |                         |
| Smithuis et al.       | 2010  | Myanmar                          | Artesunate              | Mefloquine                          | 4                                        |                                       | 1             | 3                   | Partial    | 161         |                    |                    |                    | Loose                   |
| Smithuis et al.       | 2010  | Myanmar                          | Artesunate              | Mefloquine                          | 4                                        |                                       | 1             | 3                   | Partial    | 169         |                    |                    |                    | Fixed Dose              |
| Smithuis et al.       | 2006  | Myanmar                          | Artesunate              | Mefloquine                          | 4                                        |                                       | 1             | 3                   | Yes        | 162         | 55                 | 6                  |                    | Supervised              |
| Smithuis et al.       | 2004a | Myanmar                          | Artesunate              | Mefloquine                          | 4                                        |                                       | 1             | 3                   | Yes        | 198         |                    |                    |                    | Supervised              |
| Smithuis et al.       | 2004a | Myanmar                          | Artesunate              | Mefloquine                          | 4                                        |                                       | 1             | 1                   | Yes        | 203         |                    |                    |                    | MQ15 single dose        |
| Smithuis et al.       | 2004a | Myanmar                          | Artesunate              | Mefloquine                          | 4                                        |                                       | 1             | 1                   | Yes        | 206         |                    |                    |                    | MQ25 single dose        |
| Smithuis et al.       | 2004b | Myanmar                          | Artesunate              | Mefloquine                          | 4                                        |                                       | 1             | 1                   | Yes        | 78          |                    |                    | 5                  |                         |
| Smithuis et al.       | 2006  | Myanmar                          | Dihydroartemisinin      | Piperaquine                         | 2.1                                      |                                       | 1             | 3                   | No         | 171         |                    |                    |                    | Unsupervised            |
| Smithuis et al.       | 2006  | Myanmar                          | Dihydroartemisinin      | Piperaquine                         | 2.1                                      |                                       | 1             | 3                   | Yes        | 156         | 47                 | 3                  |                    | Supervised              |
| Smithuis et al.       | 2010  | Myanmar                          | Dihydroartemisinin      | Piperaquine                         | 2.5                                      |                                       | 1             | 3                   | Partial    | 161         |                    |                    |                    |                         |
| Song et al.           | 2011  | Cambodia                         | Artemether              | Lumefantrine                        |                                          | 160                                   | 2             | 3                   | Yes        | 55          |                    |                    |                    |                         |
| Song et al.           | 2011  | Cambodia                         | Dihydroartemisinin      | Piperaquine                         |                                          | 160                                   | 2             | 2                   | Yes        | 55          |                    |                    |                    |                         |
| Song et al.           | 2011  | Cambodia                         | Artemisinin             | Piperaquine                         |                                          | 125                                   | 1             | 2                   | Yes        | 110         |                    |                    |                    |                         |
| Sowunmi et al.        | 2005  | Nigeria                          | Artesunate              | Amodiaquine                         | 4                                        |                                       | 1             | 3                   | Yes        | 104         | 72.8               | 0                  | 0                  |                         |
| Sowunmi et al.        | 2007a | Nigeria                          | Artesunate              | Amodiaquine                         | 4                                        |                                       | 1             | 3                   | Yes        | 120         |                    |                    |                    |                         |
| Sowunmi et al.        | 2011  | Nigeria                          | Artesunate              | Amodiaquine                         | 5.5                                      |                                       | 1             | 3                   | Yes        | 60          | 10                 | 0                  | 0                  | Coformulated            |
| Sowunmi et al.        | 2011  | Nigeria                          | Artesunate              | Amodiaquine                         | 4.4-10                                   |                                       | 1             | 3                   | Yes        | 60          | 5                  | 0                  | 0                  | Copackaged              |
| Sowunmi et al.        | 2007b | Nigeria                          | Artemether              | Lumefantrine                        | 4.6-8                                    |                                       | 2             | 3                   | Partial    | 90          | 61.1               | 6.7                |                    |                         |
| Sowunmi et al.        | 2009  | Nigeria                          | Artesunate              | Mefloquine                          | 4                                        |                                       | 1             | 3                   | Yes        | 171         | 36.8               | 6.4                |                    |                         |
| Sowunmi et al.        | 2007a | Nigeria                          | Artesunate              |                                     | 4                                        |                                       | 1             | 7                   | Yes        | 120         |                    |                    |                    |                         |
| Staedke et al.        | 2004  | Uganda                           | Artesunate              | Amodiaquine                         | 4                                        |                                       | 1             | 3                   | Yes        | 130         | 55                 | 3                  | 0                  | PPR derived from figure |
| Stohrer et al.        | 2004  | The Lao PDR                      | Artemether              | Lumefantrine                        | 3.4-4                                    |                                       | 2             | 3                   | Yes        | 53          | 46.8               | 4.3                | 0                  |                         |
| Stohrer et al.        | 2004  | The Lao PDR                      | Artesunate              | Mefloquine                          | 4                                        |                                       | 1             | 3                   | Yes        | 55          | 28.3               | 1.9                | 0                  |                         |
| Suputtamongkol et al. | 2003  | Thailand                         | Artesunate              | Mefloquine                          | 4                                        |                                       | 1             | 3                   | Not stated | 320         |                    |                    |                    |                         |
| Sutherland et al.     | 2003  | The Gambia                       | Artesunate              | Chloroquine                         | 4                                        |                                       | 1             | 3                   | Yes        | 400         |                    |                    |                    |                         |
| Sutherland et al.     | 2005  | The Gambia                       | Artemether              | Lumefantrine                        | 4.8-12                                   |                                       | 2             | 3                   | Yes        | 406         |                    |                    |                    |                         |
| Swarthout et al.      | 2006  | The Democratic Republic of Cong  | Artesunate              | Amodiaquine                         | Not specified                            |                                       | 3             | Yes                 | Yes        | 90          |                    |                    | 0                  |                         |
| Swarthout et al.      | 2006  | The Democratic Republic of Cong  | Artesunate              | Sulfadoxine+Pyrimethamine           | Not specified                            |                                       | 3             | Yes                 | Yes        | 90          |                    |                    | 0                  |                         |
| Sykes et al.          | 2009  | Tanzania                         | Artesunate              | Azithromycin                        | 4                                        |                                       | 1             | 3                   | Yes        | 129         |                    |                    |                    |                         |
| Sykes et al.          | 2009  | Tanzania                         | Artemether              | Lumefantrine                        |                                          | 40-80                                 | 2             | 3                   | Partial    | 132         |                    |                    |                    |                         |
| Tall et al.           | 2007  | The Comoros Union                | Artesunate              | Amodiaquine                         | Not specified                            |                                       |               |                     | Yes        | 54          |                    | 22.5               |                    |                         |
| Tall et al.           | 2007  | The Comoros Union                | Artesunate              | Sulfadoxine+Pyrimethamine           | Not specified                            |                                       |               |                     | Yes        | 53          |                    | 13.2               |                    |                         |
| Tangpukdee et al.     | 2005  | Thailand                         | Artesunate              | Mefloquine                          | 4                                        |                                       | 1             | 3                   | Yes        | 60          |                    |                    |                    |                         |
| Tangpukdee et al.     | 2008  | Thailand                         | Artesunate              | Mefloquine                          | 4                                        |                                       | 1             | 3                   | Yes        | 65          |                    | 3.07               |                    |                         |
| Tangpukdee et al.     | 2005  | Thailand                         | Dihydroartemisinin      | Piperaquine                         | 2                                        |                                       | 1             | 3                   | Yes        | 120         |                    |                    |                    |                         |
| Tangpukdee et al.     | 2008  | Thailand                         | Artemisinin             | Piperaquine+Primaquine              | 3.2                                      |                                       | 1             | 3                   | Yes        | 65          |                    | 4.6                |                    |                         |
| Thanh et al.          | 2009  | Vietnam                          | Artesunate              | Amodiaquine                         | 4.4                                      |                                       | 1             | 3                   | Yes        | 56          |                    |                    |                    |                         |
| Thanh et al.          | 2009  | Vietnam                          | Dihydroartemisinin      | Piperaquine                         | 2.3                                      |                                       | 1             | 3                   | Yes        | 60          |                    |                    |                    |                         |
| Thapa et al.          | 2007  | Nepal                            | Artemether              | Lumefantrine                        | 4                                        |                                       | 2             | 3                   | Yes        | 66          |                    |                    |                    |                         |
| Thriemer et al.       | 2010  | Bangladesh                       | Artesunate              | Azithromycin                        | 4                                        |                                       | 1             | 3                   | Yes        | 152         | 63.21              | 0                  | 0                  |                         |
| Thriemer et al.       | 2010  | Bangladesh                       | Artemether              | Lumefantrine                        | 4                                        |                                       | 2             | 3                   | Yes        | 76          | 63.21              | 0                  | 0                  |                         |
| Thwing et al.         | 2009  | Kenya                            | Artesunate              | Amodiaquine                         | 4                                        |                                       | 1             | 3                   | Yes        | 110         | 70                 | 15.4               | 1.8                |                         |
| Tietche et al.        | 2010  | Cameroon                         | Artesunate              | Mefloquine                          | 2.5-5                                    |                                       | 1             | 3                   | Partial    | 213         |                    |                    |                    |                         |
| Tiono et al.          | 2009  | Burkina Faso, Ghana, Mali, Niger | Artesunate              | Chlorproguanil+Dapsone              | 4                                        |                                       | 1             | 3                   | Yes        | 600         | 48                 |                    |                    |                         |
| Tjitra et al.         | 2001  | Indonesia                        | Artesunate              | Sulfadoxine+Pyrimethamine           | 4                                        |                                       | 1             | 3                   | Yes        | 53          | 39.2               | 0                  | 0                  |                         |
| Toure et al.          | 2011  | Ivory coast                      | Artemether              | Lumefantrine                        | 4.6-8                                    |                                       | 2             | 3                   | Not stated | 79          |                    | 1                  | 0                  |                         |

Additional File 5 : Parasite Prevalence Rates

| Authors              | Year  | Country                           | Artemisinin Derivatives | Partner Drug                          | Artemisinin Derivatives Dose (mg/kg/day) | Artemisinin Derivatives Dose (mg/day) | Doses Per Day | Days of Artemisinin | Supervised | Sample Size | D1 Parasitemic (%) | D2 Parasitemic (%) | D3 Parasitemic (%) | Comments                |
|----------------------|-------|-----------------------------------|-------------------------|---------------------------------------|------------------------------------------|---------------------------------------|---------------|---------------------|------------|-------------|--------------------|--------------------|--------------------|-------------------------|
| Toure et al.         | 2009  | Ivory Coast                       | Artemether              | Lumefantrine                          | 4.6-8                                    |                                       | 2             | 3                   | Partial    | 61          | 31.1               | 0                  | 0                  |                         |
| Toure et al.         | 2011  | Ivory coast                       | Artesunate              | Mefloquine                            |                                          | 50                                    | 1             | 3                   | Not stated | 77          |                    | 1                  | 0                  | Paediatric Formulation  |
| Toure et al.         | 2009  | Ivory Coast                       | Artemisinin             | Naphthoquine                          | 20.9-28.6                                |                                       | 2             | 1                   | Partial    | 62          | 29                 | 0                  | 0                  |                         |
| Trung et al.         | 2009  | Vietnam                           | Dihydroartemisinin      | Piperaquine                           | Not specified                            |                                       | 2             | 2                   | Yes        | 51          |                    |                    |                    |                         |
| Trung et al.         | 2009  | Vietnam                           | Artemisinin             | Piperaquine                           |                                          | 62.5-125                              | 1             | 2                   | Yes        | 52          |                    |                    |                    |                         |
| Tshefu et al         | 2010  | The Democratic Republic of Congo  | Artemether              | Lumefantrine                          | 1.8-4                                    |                                       | 2             | 3                   | Yes        | 423         | 48                 | 4.7                |                    |                         |
| Tshefu et al         | 2010  | The Democratic Republic of Congo  | Artesunate              | Pyronaridine                          | 2.4-4.6                                  |                                       | 1             | 3                   | Yes        | 849         | 34                 | 4.5                |                    |                         |
| Tun et al.           | 2009  | Myanmar                           | Artemisinin             | Naphthoquine                          |                                          | 1000                                  | 1             | 1                   | Yes        | 53          |                    |                    |                    |                         |
| Ursing et al.        | 2011  | Guinea-Bissau                     | Artemether              | Lumefantrine                          |                                          | 40-160                                | 2             | 3                   | Yes        | 190         |                    |                    |                    |                         |
| Valecha et al.       | 2009  | India                             | Artemether              | Lumefantrine                          | 4-4.6                                    |                                       | 2             | 3                   | Yes        | 71          |                    | 9.9                |                    |                         |
| Valecha et al.       | 2009  | India                             | Artemether              | Lumefantrine                          | 4-4.6                                    |                                       | 2             | 3                   | Yes        | 53          |                    | 20.8               |                    |                         |
| Valecha et al.       | 2010b | Thailand, The Lao PDR and India   | Artesunate              | Mefloquine                            | 4                                        |                                       | 1             | 3                   | Yes        | 381         |                    |                    | 2.4                |                         |
| Valecha et al.       | 2010b | Thailand, The Lao PDR and India   | Dihydroartemisinin      | Piperaquine                           | 2.25                                     |                                       | 1             | 3                   | Yes        | 767         |                    |                    | 2.4                |                         |
| Valecha et al.       | 2010a | Thailand, India, and Tanzania     | Arterolane              |                                       |                                          | 100                                   | 1             | 7                   | Yes        | 76          |                    |                    |                    |                         |
| Valecha et al.       | 2010a | Thailand, India, and Tanzania     | Arterolane              |                                       |                                          | 200                                   | 1             | 7                   | Yes        | 76          |                    |                    |                    |                         |
| Valecha et al.       | 2010a | Thailand, India, and Tanzania     | Arterolane              |                                       |                                          | 50                                    | 1             | 7                   | Yes        | 78          |                    |                    |                    |                         |
| van den Broek et al. | 2006  | The Democratic Republic of Congo  | Artesunate              | Amodiaquine                           | 4                                        |                                       | 1             | 3                   | Yes        | 101         |                    |                    | 0                  |                         |
| van den Broek et al. | 2005a | Sudan                             | Artesunate              | Amodiaquine                           | 4                                        |                                       | 1             | 3                   | Yes        | 134         |                    | 17                 |                    |                         |
| van den Broek et al. | 2006  | The Democratic Republic of Congo  | Artemether              | Lumefantrine                          | Not specified                            |                                       | 2             | 3                   | Yes        | 106         |                    |                    | 0                  |                         |
| van den Broek et al. | 2005b | Bangladesh                        | Artemether              | Lumefantrine                          | Not specified                            |                                       | 2             | 3                   | Yes        | 121         |                    |                    |                    |                         |
| van den Broek et al. | 2005b | Bangladesh                        | Artesunate              | Mefloquine                            | 4                                        |                                       | 1             | 3                   | Yes        | 121         |                    |                    |                    |                         |
| van den Broek et al. | 2006  | The Democratic Republic of Congo  | Artesunate              | Sulfadoxine+Pyrimethamine             | 4                                        |                                       | 1             | 3                   | Yes        | 91          |                    |                    | 0                  |                         |
| van den Broek et al. | 2005a | Sudan                             | Artesunate              | Sulfadoxine+Pyrimethamine             | 4                                        |                                       | 1             | 3                   | Yes        | 135         |                    | 22                 |                    |                         |
| van Vugt et al.      | 2002  | Thailand                          | Artesunate              | Atovaquone+Proguanil                  | 4                                        |                                       | 1             | 3                   | Yes        | 533         |                    |                    | 0.4                |                         |
| van Vugt et al.      | 2000  | Thailand                          | Artemether              | Lumefantrine                          | 3.2                                      |                                       | 2             | 3                   | Yes        | 150         | 76                 | 8                  | 1                  | PPR derived from figure |
| van Vugt et al.      | 2000  | Thailand                          | Artesunate              | Mefloquine                            | 4                                        |                                       | 1             | 3                   | Yes        | 50          | 74                 | 10                 | 0                  | PPR derived from figure |
| van Vugt et al.      | 2002  | Thailand                          | Artesunate              | Mefloquine                            | 4                                        |                                       | 1             | 3                   | Yes        | 533         |                    |                    | 0.4                |                         |
| Vasquez et al.       | 2009  | Colombia                          | Artesunate              | Mefloquine                            |                                          | 50-200                                | 1             | 3                   | Not stated | 25          | 50                 | 4                  | 0                  |                         |
| Vasquez et al.       | 2009  | Colombia                          | Artesunate              | Mefloquine+Primaquine                 |                                          | 50-200                                | 1             | 3                   | Not stated | 25          | 50                 | 0                  | 0                  |                         |
| von Seidlein et al.  | 2000  | The Gambia                        | Artesunate              | Sulfadoxine+Pyrimethamine             | 4                                        |                                       | 1             | 1                   | Yes        | 200         | 47                 | 8                  | 0.5                |                         |
| von Seidlein et al.  | 2000  | The Gambia                        | Artesunate              | Sulfadoxine+Pyrimethamine             | 4                                        |                                       | 1             | 3                   | Yes        | 200         | 47                 | 1                  | 0                  |                         |
| von Seidlein et al.  | 2001  | The Gambia                        | Artesunate              | Sulfadoxine+Pyrimethamine             | 4                                        |                                       | 1             | 3                   | Yes        | 74          |                    |                    |                    |                         |
| von Seidlein et al.  | 2001  | The Gambia                        | Artesunate              | Sulfadoxine+Pyrimethamine             | 4                                        |                                       | 1             | 1                   | Yes        | 113         |                    |                    |                    |                         |
| Wang et al.          | 2001  | Equatorial Guinea                 | Dihydroartemisinin      | Mefloquine                            |                                          | 120                                   | 1             | 1                   | Not stated | 54          |                    |                    |                    |                         |
| Warsame et al.       | 2009  | Somalia                           | Artesunate              | Amodiaquine                           | 4                                        |                                       | 1             | 3                   | Yes        | 198         |                    |                    |                    |                         |
| Warsame et al.       | 2009  | Somalia                           | Artesunate              | Sulfadoxine+Pyrimethamine             | 4                                        |                                       | 1             | 3                   | Yes        | 293         |                    |                    |                    |                         |
| Wattanakoon et al.   | 2003  | Thailand                          | Artesunate              | Mefloquine                            |                                          | 100-150                               | 1             | 2                   | Not stated | 516         |                    | 5                  |                    |                         |
| Weerasinghe et al.   | 2002  | Sri Lanka                         | Artesunate              | Sulphadoxine+Pyrimethamine+Primaquine | 4                                        |                                       | 1             | 3                   | Yes        | 30          | 20                 | 3                  |                    |                         |
| Whegang et al.       | 2010  | Cameroon                          | Artesunate              | Amodiaquine                           | 4                                        |                                       | 1             | 3                   | Yes        | 278         |                    |                    | 1.3                |                         |
| Whegang et al.       | 2010  | Cameroon                          | Artesunate              | Chlorproguanil+Dapsone                | 4                                        |                                       | 1             | 3                   | Yes        | 83          |                    |                    | 2.4                |                         |
| Whegang et al.       | 2010  | Cameroon                          | Artemether              | Lumefantrine                          | Not specified                            |                                       | 2             | 3                   | Yes        | 61          |                    |                    | 0                  |                         |
| Whegang et al.       | 2010  | Cameroon                          | Artesunate              | Mefloquine                            | 4                                        |                                       | 1             | 3                   | Yes        | 69          |                    |                    | 4.3                |                         |
| Whegang et al.       | 2010  | Cameroon                          | Dihydroartemisinin      | Piperaquine                           | 2.1                                      |                                       | 1             | 3                   | Yes        | 91          |                    |                    | 0                  |                         |
| Whegang et al.       | 2010  | Cameroon                          | Artesunate              | Sulfadoxine+Pyrimethamine             | 4                                        |                                       | 1             | 3                   | Yes        | 146         |                    |                    | 3.2                |                         |
| Wong et al.          | 2003  | Malaysia                          | Artemisinin             | Beta cyclodextrin                     |                                          | 300                                   | 2             | 5                   | Yes        | 50          |                    |                    |                    |                         |
| Wong et al.          | 2003  | Malaysia                          | Artemisinin             |                                       |                                          | 500                                   | 2             | 5                   | Yes        | 50          |                    |                    |                    |                         |
| Wootton et al.       | 2008  | Malawi and The Gambia             | Artesunate              | Chlorproguanil+Dapsone                | 1                                        |                                       | 1             | 3                   | Yes        | 47          |                    |                    |                    |                         |
| Wootton et al.       | 2008  | Malawi and The Gambia             | Artesunate              | Chlorproguanil+Dapsone                | 2                                        |                                       | 1             | 3                   | Yes        | 45          |                    |                    |                    |                         |
| Wootton et al.       | 2008  | Malawi and The Gambia             | Artesunate              | Chlorproguanil+Dapsone                | 4                                        |                                       | 1             | 3                   | Yes        | 40          |                    |                    |                    |                         |
| Yavo et al.          | 2011  | Cameroon, Ivory Coast and Senegal | Artemether              | Lumefantrine                          | 4.6-8                                    |                                       | 2             | 3                   | Yes        | 187         | 43                 | 5.9                |                    |                         |
| Yavo et al.          | 2011  | Cameroon, Ivory Coast and Senegal | Dihydroartemisinin      | Piperaquine                           | 2.4-4                                    |                                       | 1             | 3                   | Yes        | 197         | 42.9               | 4.7                |                    |                         |
| Yeka et al.          | 2005  | Uganda                            | Artesunate              | Amodiaquine                           | 4                                        |                                       | 1             | 3                   | Yes        | 731         |                    | 5.5                |                    |                         |
| Yeka et al.          | 2008  | Uganda                            | Artemether              | Lumefantrine                          | 4.6-8                                    |                                       | 2             | 3                   | Yes        | 199         |                    | 2.5                | 0                  |                         |
| Yeka et al.          | 2008  | Uganda                            | Dihydroartemisinin      | Piperaquine                           | 2.1                                      |                                       | 1             | 3                   | Yes        | 215         |                    | 3.3                | 0                  |                         |
| Zongo et al.         | 2007a | Burkina Faso                      | Artemether              | Lumefantrine                          | 4.6-8                                    |                                       | 2             | 3                   | Yes        | 261         |                    | 4.6                | 1.6                |                         |
| Zongo et al.         | 2007b | Burkina Faso                      | Artemether              | Lumefantrine                          | 4.6-8                                    |                                       | 2             | 3                   | Yes        | 188         |                    | 3                  | 0                  |                         |
| Zongo et al.         | 2007b | Burkina Faso                      | Dihydroartemisinin      | Piperaquine                           | 6.4                                      |                                       | 1             | 3                   | Yes        | 187         |                    | 3                  | 0                  |                         |
| Zoungrana et al.     | 2008  | Burkina Faso                      | Artesunate              | Amodiaquine                           | 4                                        |                                       | 1             | 3                   | Yes        | 61          |                    | 21.3               | 4.9                |                         |
| Zoungrana et al.     | 2008  | Burkina Faso                      | Artesunate              | Methylene blue                        | 4                                        |                                       | 1             | 3                   | Yes        | 61          |                    | 11.5               | 1.6                |                         |
